# Supplementary material for: Gambaran radiografi Ehlers-Danlos Syndrome pada rongga mulut.
Source: Springer Nature journal article supplement (doi:10.1186/1471-2105-12-242), 2011-06-16
Supplement: 12859_2010_4731_MOESM2_ESM.pdf [file 12859_2010_4731_MOESM2_ESM.pdf]

|          |    |   |    |   |    |   |   |    |   |    |    |    |    |    |    |    |    |    |    |    |    |
|----------|----|---|----|---|----|---|---|----|---|----|----|----|----|----|----|----|----|----|----|----|----|
| $j$      | 0  | 1 | 2  | 3 | 4  | 5 | 6 | 7  | 8 | 9  | 10 | 11 | 12 | 13 | 14 | 15 | 16 | 17 | 18 | 19 | 20 |
| $C_R[j]$ | a  | a | c  | a | a  | c | t | c  | a | a  | t  | t  | c  | a  | a  | a  | c  | a  | a  | g  | c  |
| $SA[j]$  | 13 | 0 | 14 | 3 | 17 | 8 | 1 | 15 | 4 | 18 | 9  | 20 | 12 | 2  | 16 | 7  | 5  | 19 | 11 | 6  | 10 |
| $g(j)$   | 0  | 1 | 2  | 3 | 4  | 5 | 6 | 7  | 8 | 9  | 10 | 11 | 12 | 13 | 14 |    |    |    |    |    |    |

|           |   |    |   |    |   |   |    |   |    |   |    |    |    |    |    |
|-----------|---|----|---|----|---|---|----|---|----|---|----|----|----|----|----|
| $i$       | 0 | 1  | 2 | 3  | 4 | 5 | 6  | 7 | 8  | 9 | 10 | 11 | 12 | 13 | 14 |
| $GkSA[i]$ | 0 | 10 | 3 | 13 | 6 | 1 | 11 | 4 | 14 | 7 | 2  | 12 | 5  | 9  | 8  |
| rank      | 0 |    | 1 | 2  | 3 |   | 4  | 5 | 6  | 7 |    |    | 8  | 9  |    |

|            |   |   |   |   |   |   |   |   |   |   |    |    |    |    |    |
|------------|---|---|---|---|---|---|---|---|---|---|----|----|----|----|----|
| $i$        | 0 | 1 | 2 | 3 | 4 | 5 | 6 | 7 | 8 | 9 | 10 | 11 | 12 | 13 | 14 |
| $GkIFA[i]$ | 0 | 3 | 7 | 0 | 4 | 7 | 2 | 6 | 9 | 8 | 0  | 3  | 7  | 1  | 5  |

|                |    |   |   |   |   |   |   |    |    |    |    |
|----------------|----|---|---|---|---|---|---|----|----|----|----|
| $\ell$         | -1 | 0 | 1 | 2 | 3 | 4 | 5 | 6  | 7  | 8  | 9  |
| $GkCFA[\ell]$  |    | 3 | 1 | 1 | 2 | 1 | 1 | 1  | 3  | 1  | 1  |
| $GkCFPS[\ell]$ | 0  | 3 | 4 | 5 | 7 | 8 | 9 | 10 | 13 | 14 | 15 |
