# Supplementary material for: Gambaran radiografi Ehlers-Danlos Syndrome pada rongga mulut.
Source: Springer Nature journal article supplement (doi:10.1186/1471-2105-12-242), 2011-06-16
Supplement: 12859_2010_4731_MOESM4_ESM.pdf [file 12859_2010_4731_MOESM4_ESM.pdf]

| generalized<br>Suffix<br>Array | Construction<br>time | Memory<br>building $gSA(C_R)$ | Cumulated memory footprint |                    |                     |
|--------------------------------|----------------------|-------------------------------|----------------------------|--------------------|---------------------|
|                                | $O(mq)$              | $4.02mq$                      | $gSA$ built<br>$4mq$       | ISA built<br>$8mq$ | LCP built<br>$12mq$ |

(a)

| $Gk$ arrays | Construction<br>time | Memory<br>building $gSA(C_R)$ | Cumulated memory footprint  |                                                         |                                                |
|-------------|----------------------|-------------------------------|-----------------------------|---------------------------------------------------------|------------------------------------------------|
|             | $O(mq)$              | $4.02mq$                      | $GkSA$ built<br>$4\hat{m}q$ | $GkIFA$ & $GkCFA$ built<br>$8\hat{m}q + 4(\hat{r} + 1)$ | $GkCFPS$ built<br>$8\hat{m}q + 4(\hat{r} + 1)$ |

(b)

|    | $Gk$ arrays        | generalized Suffix Array |
|----|--------------------|--------------------------|
| Q1 | $O(occ\_Reads(f))$ | $O(q + occ\_C_R(f))$     |
| Q2 | $O(occ\_Reads(f))$ | $O(q + occ\_C_R(f))$     |
| Q3 | $O(occ\_Reads(f))$ | $O(occ\_C_R(f))$         |
| Q4 | $O(1)$             | $O(occ\_C_R(f))$         |
| Q5 | $O(occ\_Reads(f))$ | $O(q + occ\_C_R(f))$     |
| Q6 | $O(occ\_Reads(f))$ | $O(q + occ\_C_R(f))$     |
| Q7 | $O(occ\_Reads(f))$ | $O(q + occ\_C_R(f))$     |

(c)
