# Supplementary material for: Gambaran radiografi Ehlers-Danlos Syndrome pada rongga mulut.
Source: Springer Nature journal article supplement (doi:10.1186/1471-2105-12-242), 2011-06-16
Supplement: 12859_2010_4731_MOESM5_ESM.pdf [file 12859_2010_4731_MOESM5_ESM.pdf]

Space consumption during gSA construction

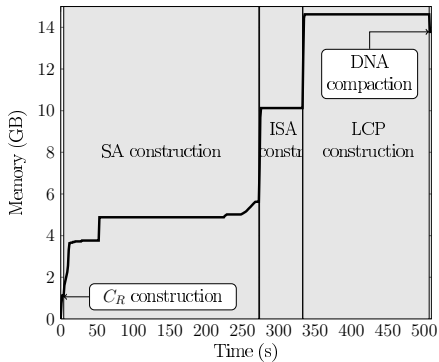

(a)

Space consumption during  $Gk$  arrays construction

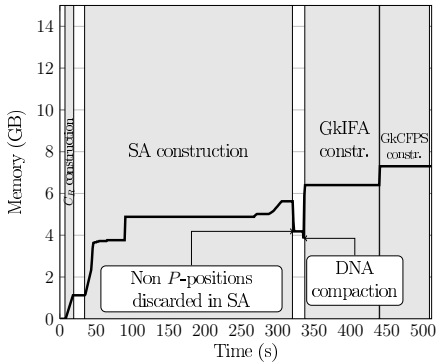

(b)
