# Supplementary material for: Gambaran radiografi Ehlers-Danlos Syndrome pada rongga mulut.
Source: Springer Nature journal article supplement (doi:10.1186/1471-2105-12-242), 2011-06-16

Maximal memory consumption

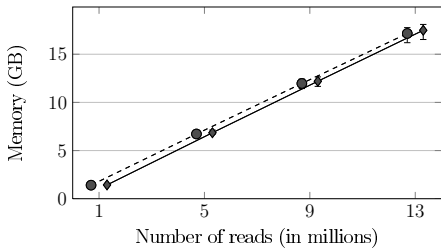

(a)

Construction time

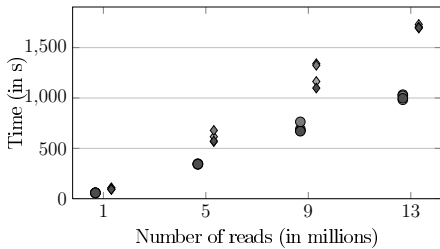

(b)

Query 1

Query 2

Query 3

Query 4

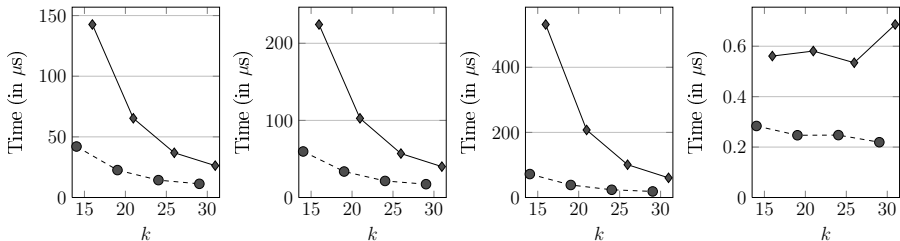

(c)

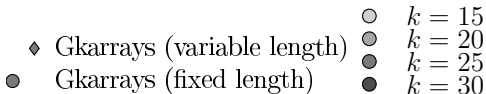

Supplement: 12859_2010_4731_MOESM7_ESM.pdf [file 12859_2010_4731_MOESM7_ESM.pdf]
